# Supplementary material for: Serologic Evidence for MERS-CoV Infection in Dromedary Camels, Punjab, Pakistan, 2012–2015
Source: PubMed Central journal article supplement (PMC5382745; doi:10.3201/eid2303.161285), 2017-03
Supplement: 16-1285-Techapp-s1.pdf [file 16-1285-Techapp-s1.pdf]

# Serologic Evidence for MERS-CoV Infection in Dromedary Camels, Punjab, Pakistan, 2012–2015

## Technical Appendix

Technical Appendix Table. Univariate analysis of potential risk factors associated with MERS-CoV seropositivity in dromedary camels of Punjab, Pakistan

| Variable | Category     | No. tested | No. positive | Prevalence, % | 95% CI    | Odds ratio (95% CI) | p value                      |
|----------|--------------|------------|--------------|---------------|-----------|---------------------|------------------------------|
| Sex      | Male         | 217        | 96           | 44.2          | 37.5–51.1 | 1.38 (0.98–1.95)    | $\chi^2 = 3.36$ (p = 0.067)  |
|          | Female       | 348        | 127          | 36.5          | 31.4–41.8 | 1                   |                              |
| Age      | >10 Years    | 88         | 43           | 48.9          | 38.1–59.8 | 2.23 (1.25–4.30)    | $\chi^2 = 25.51$ (p < 0.001) |
|          | 5.1–10 Years | 180        | 92           | 51.1          | 43.6–58.6 | 2.53 (1.47–4.36)    |                              |
|          | 2.1–5 Years  | 208        | 62           | 29.8          | 23.7–36.5 | 1.03 (0.60–1.77)    |                              |
|          | ≤2 Years     | 89         | 26           | 29.2          | 20.1–39.8 | 1                   |                              |
